# Supplementary material for: Solvent-regulated biomorphs from the intense π,π-mediated assemblies of tetracenequinone fused porphyrin
Source: Royal Society of Chemistry journal article supplement (doi:10.1039/d1ce01173a), 2021-01-01
Supplement: d1ce01173a1.pdf [file d1ce01173a1.pdf]

# Supporting Information

## Solvent-Regulated Biomorphs from the Intense $\pi,\pi$ -Mediated Assemblies of Tetracenequinone Fused Porphyrin

Chen Chen,<sup>a</sup> Dan Li,<sup>a</sup> Guanyue Cao,<sup>a</sup> Zhonghe Qin,<sup>b</sup> Yi Xu,<sup>b</sup> Xiujun Liu,<sup>\*a</sup> Qizhao Li<sup>a</sup>,  
Yongshu Xie,<sup>a</sup> and Chengjie Li<sup>\*a</sup>

<sup>†</sup> *Key Laboratory for Advanced Materials and Institute of Fine Chemicals, Shanghai Key Laboratory  
of Functional Materials Chemistry, School of Chemistry & Molecular Engineering, East China*

*University of Science & Technology, 200237, Shanghai, China.*

<sup>‡</sup> *Shanghai World Foreign Language Academy, 200237, Shanghai, China.*

### Table of Content

|                                                          |         |
|----------------------------------------------------------|---------|
| 1. Experimental Procedure                                | S2-S4   |
| 2. NMR and Mass Spectra                                  | S5-S12  |
| 3. Absorption Spectra and Electrochemical Data           | S13     |
| 4. SEM images, Crystal structures and Assembling Process | S14-S19 |
| 5. References                                            | S20     |

## 1. Experimental Procedure

### General

Commercially available solvents and reagents were used without further purification unless otherwise mentioned. Thin-layer chromatography (TLC) was carried out on glass sheets coated with silica gel 60 F<sub>254</sub> (Qingdao Haiyang Chemical Co., Ltd). <sup>1</sup>H NMR spectra were obtained using a Bruker AM 400 spectrometers, and the chemical shifts of <sup>1</sup>H were reported relative CDCl<sub>3</sub> ( $\delta = 7.26$ ), or *D*<sub>8</sub>-toluene ( $\delta = 2.08$ ), while those of <sup>13</sup>C CDCl<sub>3</sub> ( $\delta = 77.16$ ), or *D*<sub>8</sub>-toluene ( $\delta = 20.43$  for CD<sub>3</sub> of *D*<sub>8</sub>-toluene). **Ni4TQ** and **Ni4AQ** both are highly symmetric, and the assignments are marked on a quarter of the molecules. UV-Vis absorption spectra were recorded on Shimadzu UV2600 spectrophotometer at room temperature. Mass data was obtained on the AB-4800plus MALDI-TOF mass spectrometer.

### Crystallography

X-ray analyses were performed on a APEX-II equipped with a CCD detector (Bruker) using CuK $\alpha$  (graphite, monochromated,  $\lambda = 1.54178$  Å) radiation. The structures were solved by the direct method of SHELXS-2014 and refined using the SHELXL-2014 and Olex2 1.2 programs. The cif files of **Ni4AQ** (2082682), **Ni4TQ** (2082681) and another rough crystal structure of **Ni4TQ** grown from CS<sub>2</sub>/*n*-hexane have been uploaded as SI of this manuscript.

### Electrochemical Measurements

Cyclic voltametric (CV) and differential pulse voltametric (DPV) studies were carried out on a CorrTest Instrument Model CS350H with electrochemical system utilizing the three-electrode configuration consisting of a glassy carbon electrode (working electrode), platinum ring (counter electrode) and silver wire (reference electrode) in *o*-dichlorobenzene with *n*-tetrabutylammonium tetrafluoroborate (TBABF<sub>4</sub>) as a supporting electrolyte. Potentials were calibrated with the ferrocene/ferrocenium couple as external standard.

### Preparation of self-assembled microstructures

For the preparation of the samples, **Ni4TQ** was dissolved in a “good” solvent (THF or toluene) and subsequently a “bad” solvent (MeOH or isopropanol) was introduced. After 1 hour, the suspension solution was dropped on a mica slice and the remaining liquid was removed by filter paper stripes. For the case of assembly at 3:7 of THF:MeOH, **Ni4TQ** precipitated on the wall of the glass vial, thus the assemblies on the wall were pictured by SEM after 1 hour or 18 hours.

### Scanning electron microscopy

For SEM observations the samples were covered with 10 nm Au sputtering and were observed directly. The SEM experiments were performed by using a S-3400N microscope operating at 15 kV.

## Synthesis

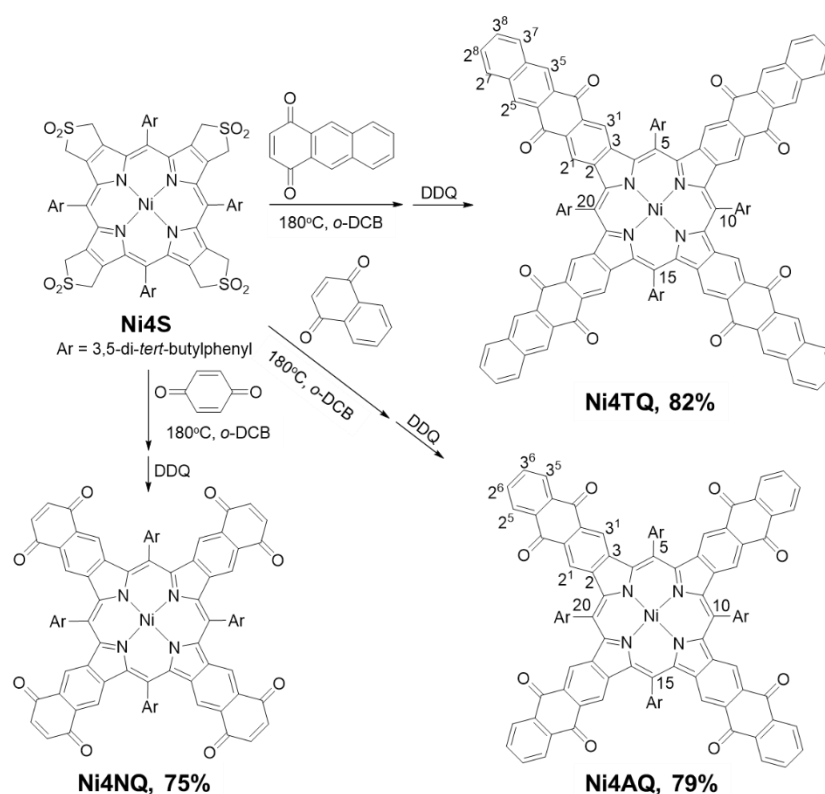

### Synthesis of Ni4TQ

**Ni4S**<sup>[1]</sup> (30.0 mg, 20.26  $\mu\text{mol}$ , 1 eq), **AQ**<sup>[2]</sup> (140 mg, 670.0  $\mu\text{mol}$ , 33 eq), *o*-DCB (25 ml) were placed in a 50 ml round bottom flask and the air in the flask is replaced with argon. The reaction was heated to 180°C for 30 min and monitored by TLC until the reaction of raw material **Ni4S** is used up. DDQ (45 mg, 0.20 mmol, 10 eq) was added. After the reaction mixture was stirred at 110°C for 5 hours, the reaction was quenched with saturated aqueous  $\text{NaHCO}_3$  and extracted with  $\text{CH}_2\text{Cl}_2$  ( $3 \times 30$  ml). The combined organic layers were dried with  $\text{Na}_2\text{SO}_4$ , filtered, and evaporated under reduced pressure. The crude product dissolved in *o*-DCB was obtained, which was separated by chromatographic silica gel plate ( $\text{CS}_2/\text{DCM} = 2:1$ ). Finally, **Ni4TQ** (34.0 mg, 82%) was obtained as a green powder after recrystallization from  $\text{CS}_2$ /hexane; M. p. > 300 °C; UV/Vis/NIR [toluene,  $\lambda_{\text{max}}$  (nm) ( $\epsilon \times 10^{-5}/\text{mol}^{-1}\text{dm}^3\text{cm}^{-1}$ ): 704 (1.795), 513 (2.456);  $^1\text{H}$  NMR (400 MHz,  $\text{CDCl}_3/\text{CS}_2$ ):  $\delta$  (ppm) = 8.86 (s, 8H), 8.35 (t, 4H,  $J = 1.7$  Hz), 8.19 (s, 8H), 8.13 (dd, 8H,  $J = 2.9$  Hz,  $J = 6.0$  Hz), 7.90 (s, 8H,  $J = 1.7$  Hz), 7.71 (dd, 8H,  $J = 2.9$  Hz,  $J = 6.0$  Hz), 1.55 (s, 72H, *t*-Bu-H);  $^1\text{H}$  NMR (400 MHz,  $D^8$ -toluene):  $\delta$  (ppm) = 8.75 (s, 8H), 8.71 (2, 4H), 8.57 (t, 4H,  $J = 1.6$  Hz), 8.15 (d, 8H,  $J = 1.6$  Hz), 7.44 (dd, 8H,  $J = 3.2$  Hz,  $J = 2.8$  Hz), 7.10 (dd, 8H, *overlapped with toluene*), 1.65 (s, 72H, *t*-Bu-H);  $^{13}\text{C}$  NMR (100 MHz,  $D^8$ -toluene, **Ni4TQ** is too insoluble to record a  $^{13}\text{C}$  NMR spectrum, the  $^{13}\text{C}$  data and partial assignments have been done on basis of the  $^1\text{H}$ ,  $^{13}\text{C}$ -HSQC and HMBC spectra):  $\delta$  (ppm) = 182.1 ( $\text{C}2^3/\text{C}3^3$ ), 142.8 ( $\text{C}2/\text{C}3$ ), 135.2 ( $\text{C}2^6/\text{C}3^6$ ), 131.1, 129.7 ( $\text{C}2^7/\text{C}3^7$ ),

129.4 (C2<sup>5</sup>/C3<sup>5</sup>), 128.7 (C2<sup>8</sup>/C3<sup>8</sup>), 127.4, 127.2 (*ortho*-Ar), 125.1 (C2<sup>1</sup>/C3<sup>1</sup>), 124.6 (*para*-Ar), 119.3, 35.7, 31.6; MS (MALDI-TOF)  $m/z$  : [M<sup>+</sup>] Calculated for C<sub>140</sub>H<sub>116</sub>N<sub>4</sub>NiO<sub>8</sub> 2038.8; found 2038.6.

#### Synthesis of Ni4AQ

**Ni4S**<sup>[1]</sup> (10.0 mg, 6.75  $\mu$ mol, 1 eq), NQ (53.3 mg, 337.5  $\mu$ mol, 50 eq), *o*-DCB (10 ml) were placed in a 25 ml round bottom flask and the air in the flask is replaced with argon. The reaction was heated to 180°C for 30 min and monitored by TLC until the reaction of raw material **Ni4S** is used up. DDQ (15 mg, 66.0  $\mu$ mol, 10 eq) was added. After the reaction mixture was stirred at 110°C for 5 hours, the reaction was quenched with saturated aqueous NaHCO<sub>3</sub> and extracted with CH<sub>2</sub>Cl<sub>2</sub> (3  $\times$  30 ml). The combined organic layers were dried with Na<sub>2</sub>SO<sub>4</sub>, filtered, and evaporated under reduced pressure. The crude product dissolved in *o*-DCB was obtained, which was diluted with PE (10 ml) and separated by column chromatography. First, the *o*-DCB is washed down with PE, and the polarity is increased slowly to DCM:PE=2:1. **Ni4AQ** was obtained (9.8 mg, 79%, green solid) after recrystallization of DCM / hex; M.p. > 300 °C; UV/Vis/NIR [toluene,  $\lambda_{\max}$  (nm) ( $\epsilon \times 10^{-5}/\text{mol}^{-1}\text{dm}^3\text{cm}^{-1}$ ): 705 (1.615), 516 (1.933); <sup>1</sup>H NMR (400 MHz, CDCl<sub>3</sub>):  $\delta$  (ppm) = 8.34 (dd, 8H,  $J = 3.3$  Hz,  $J = 5.7$  Hz), 8.23 (t, 4H,  $J = 1.4$  Hz), 8.12 (s, 8H), 7.86 (d, 8H,  $J = 1.4$  Hz), 7.78 (dd, 8H,  $J = 3.3$  ppm,  $J = 5.7$  Hz), 1.49 (s, 72H, *t*-Bu-H); <sup>13</sup>C NMR (100 MHz, CDCl<sub>3</sub>, partial assignments have been done on basis of the <sup>1</sup>H, <sup>13</sup>C-HSQC-spectrum):  $\delta$  (ppm) = 182.7 (C2<sup>3</sup>/C3<sup>3</sup>), 152.7, 142.5, 138.2, 137.0, 134.5, 133.8 (C2<sup>6</sup>/C3<sup>6</sup>), 129.5, 127.3 (C2<sup>5</sup>/C3<sup>5</sup>), 127.1 (*ortho*-Ar), 124.7 (C2<sup>1</sup>/C3<sup>1</sup>), 124.3 (*para*-Ar), 119.0, 35.5, 31.7; MS (MALDI-TOF)  $m/z$  : [M<sup>+</sup>] Calculated for C<sub>124</sub>H<sub>108</sub>N<sub>4</sub>NiO<sub>8</sub> 1838.8; found 1838.6.

#### Synthesis of Ni4NQ

**Ni4S**<sup>[1]</sup> (10.0 mg, 6.75  $\mu$ mol, 1 eq), BQ (25.5 mg, 235.9  $\mu$ mol, 35 eq), *o*-DCB (10 ml) were placed in a 25 ml round bottom flask and the air in the flask is replaced with argon. The reaction was heated to 180°C for 30 min and monitored by TLC until the reaction of raw material **Ni4S** is used up. DDQ (15.0 mg, 66.0  $\mu$ mol, 10 eq) was added. After the reaction mixture was stirred at 110°C for 5 hours, the reaction was quenched with saturated aqueous NaHCO<sub>3</sub> and extracted with CH<sub>2</sub>Cl<sub>2</sub> (3  $\times$  30 ml). The combined organic layers were dried with Na<sub>2</sub>SO<sub>4</sub>, filtered, and evaporated under reduced pressure. The crude product dissolved in *o*-DCB was obtained, which was diluted with PE (10 ml) and separated by column chromatography. First, the *o*-DCB is washed down with PE, and the polarity is increased slowly to DCM:PE=1:1. **Ni4NQ** was obtained (5.3 mg, 75%, green solid) after recrystallization of DCM / hex; M.p. > 300 °C; UV/Vis/NIR [toluene,  $\lambda_{\max}$  (nm) ( $\epsilon \times 10^{-5}/\text{mol}^{-1}\text{dm}^3\text{cm}^{-1}$ ): 714 (1.252), 526 (1.135); <sup>1</sup>H NMR (400 MHz, CDCl<sub>3</sub>):  $\delta$  (ppm) = 8.15 (t, 4H,  $J = 1.6$  Hz), 8.83 (s, 8H), 7.77 (d, 8H,  $J = 1.6$  Hz), 6.94 (s, 8H), 1.44 (s, 72H, *t*-Bu-H). The data is consistency with the reported data.<sup>[3]</sup>

## 2. NMR and Mass Spectra

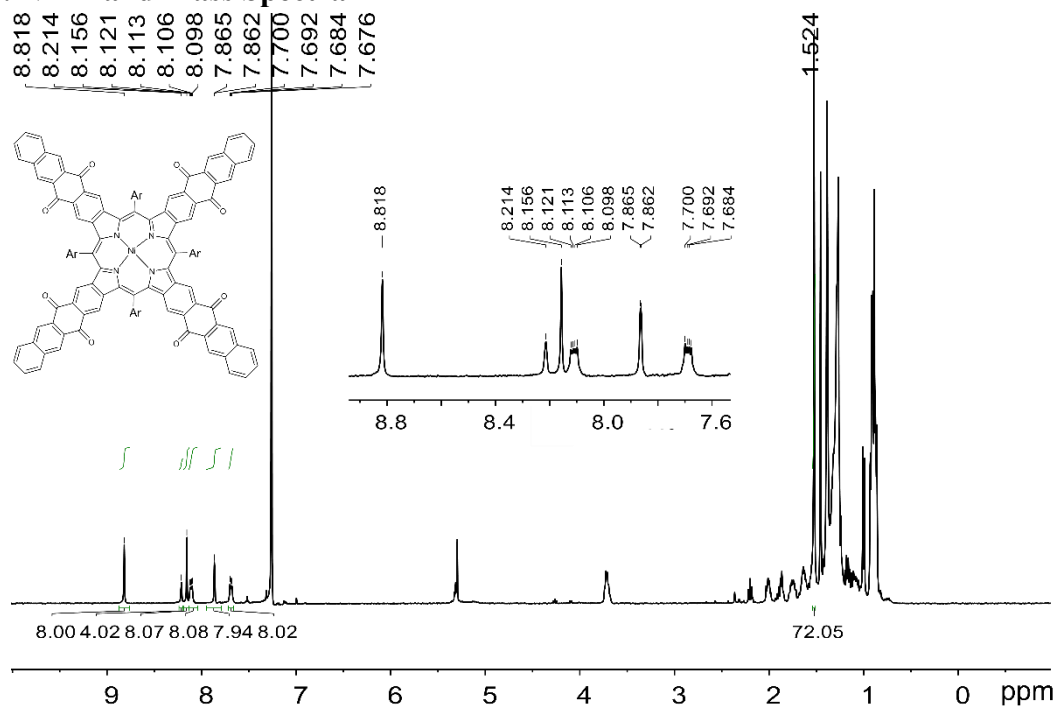

Figure S1. <sup>1</sup>H NMR spectrum of Ni<sub>4</sub>TQ in CDCl<sub>3</sub>/CS<sub>2</sub> (298 K, 400MHz).

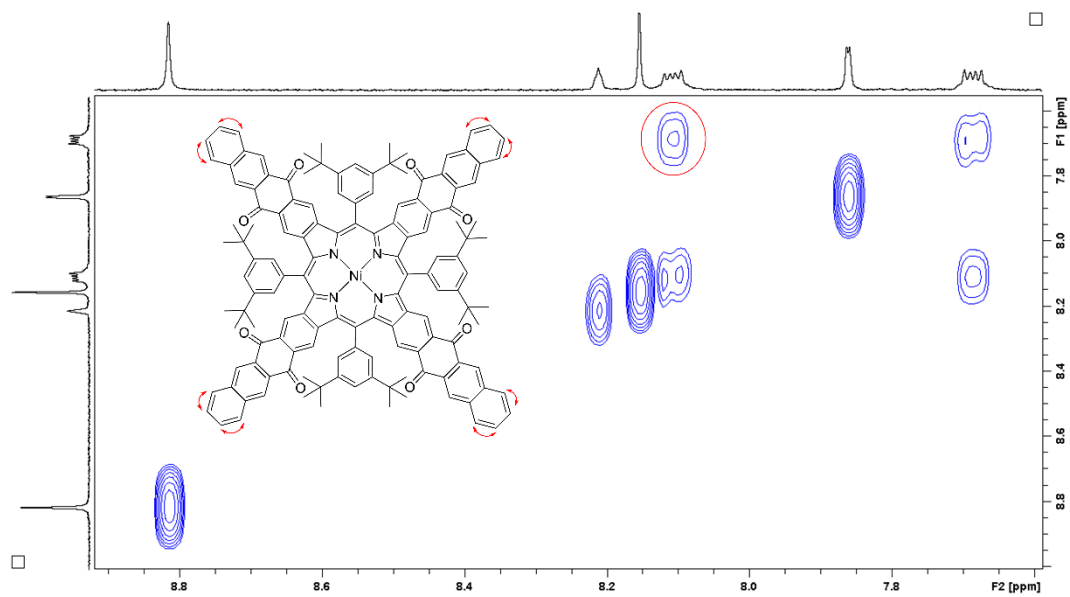

Figure S2. <sup>1</sup>H,<sup>1</sup>H-COSY spectrum of Ni<sub>4</sub>TQ in CDCl<sub>3</sub>/CS<sub>2</sub> (298 K, 400MHz).

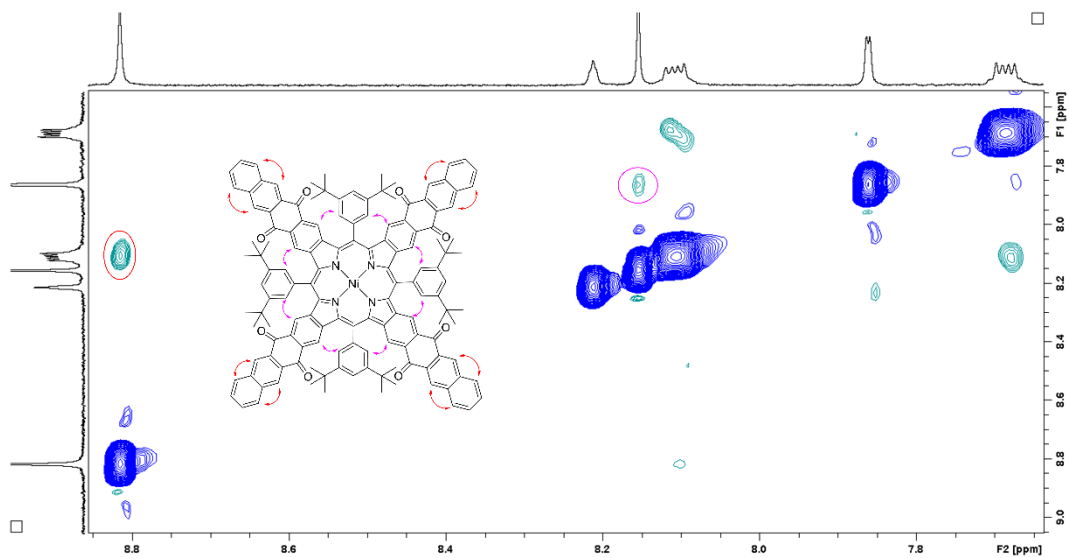

Figure S3.  $^1\text{H},^1\text{H}$ -ROESY spectrum of Ni4TQ in  $\text{CDCl}_3/\text{CS}_2$  (298 K, 400MHz).

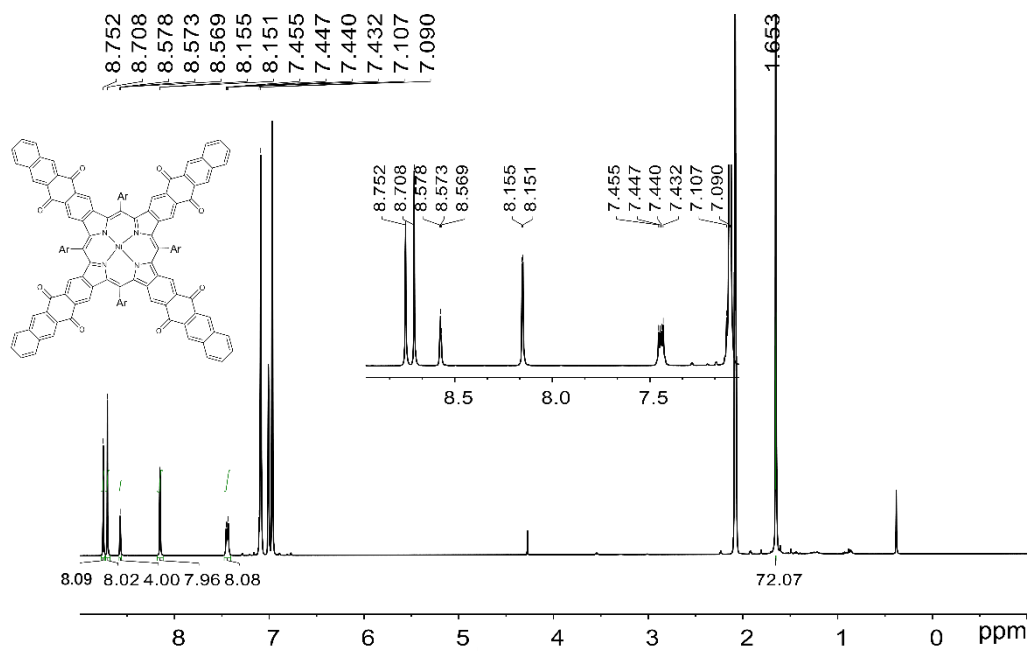

Figure S4.  $^1\text{H}$  NMR spectrum of Ni4TQ in  $D^8$ -toluene (298 K, 400MHz).

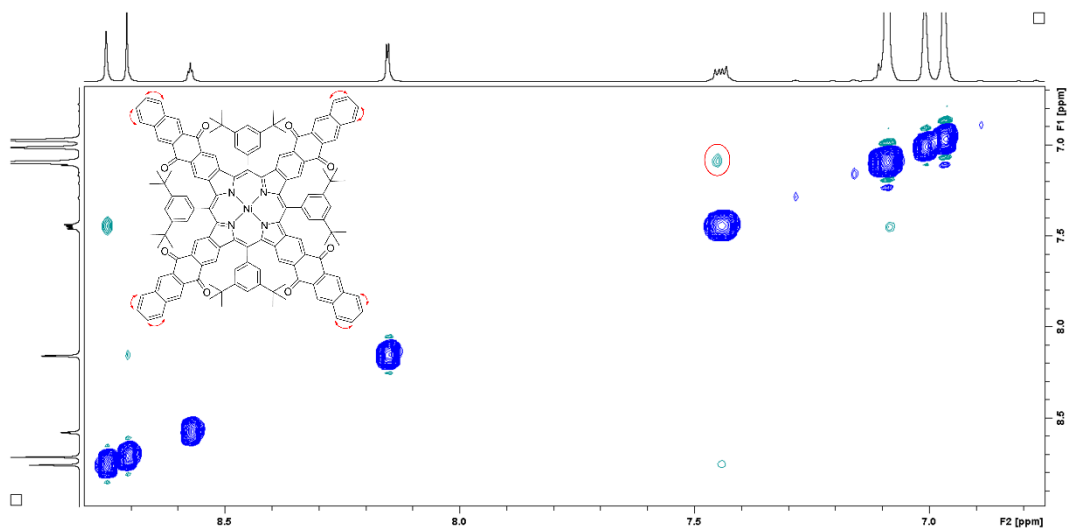

Figure S5.  $^1\text{H},^1\text{H}$ -ROESY spectrum of Ni4TQ in  $D^8$ -toluene (298 K, 400MHz).

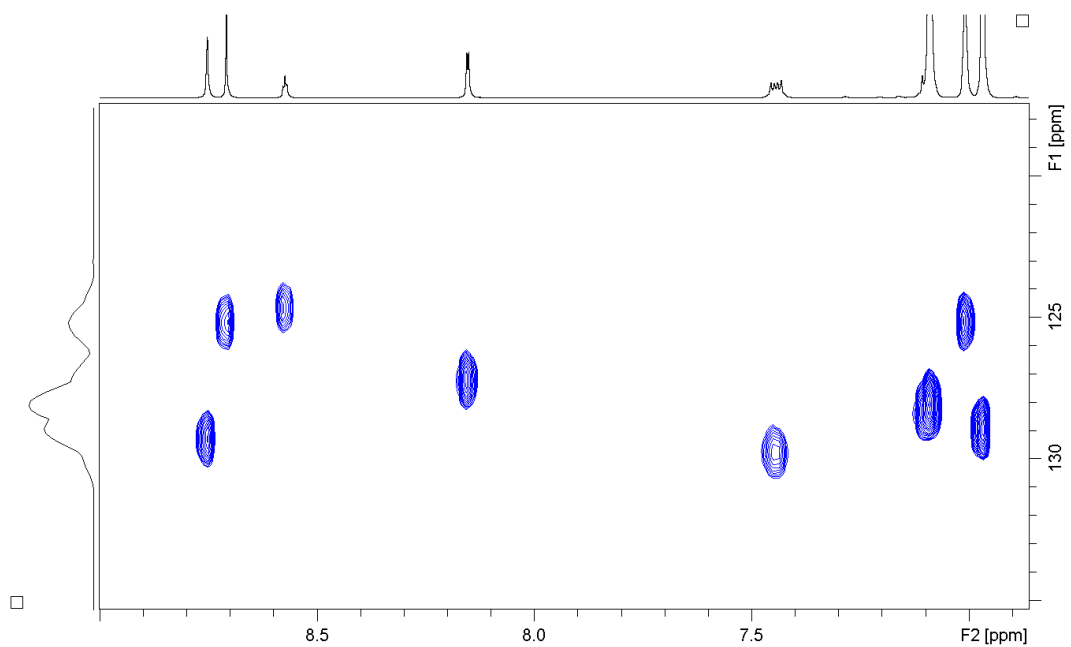

Figure S6.  $^1\text{H},^{13}\text{C}$ -HSQC spectrum of Ni4TQ in  $D^8$ -toluene (298 K, 400MHz).

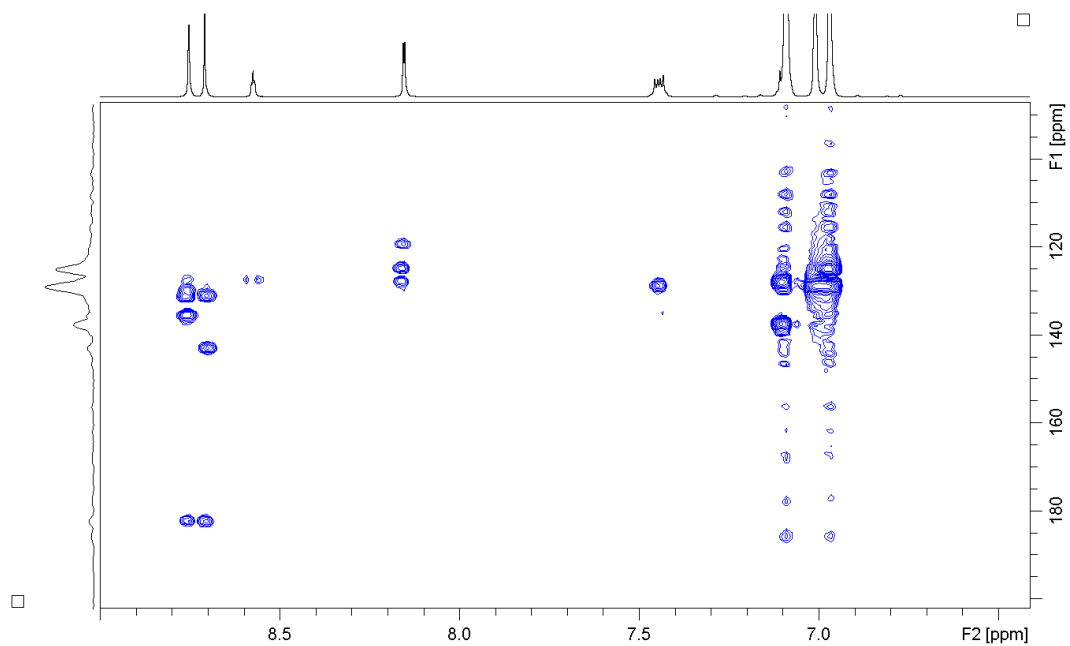

Figure S7.  $^1\text{H}$ ,  $^{13}\text{C}$ -HMBC spectrum of Ni4TQ in  $D^8$ -toluene (298 K, 400MHz).

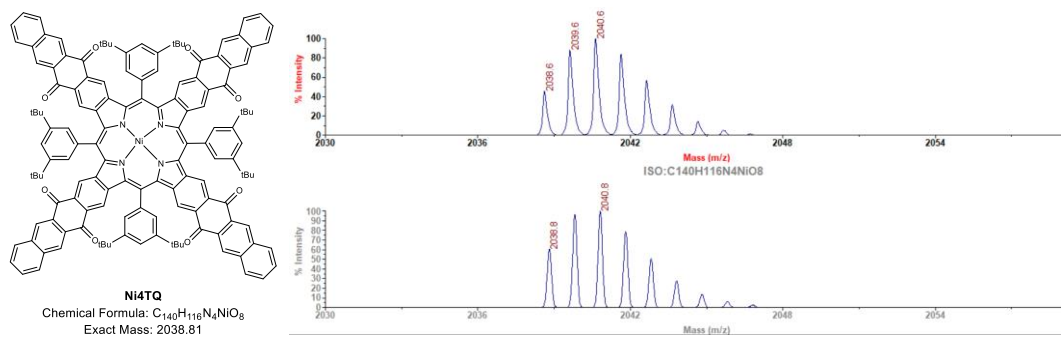

Figure S8. MS (MALDI-TOF) of Ni4TQ.



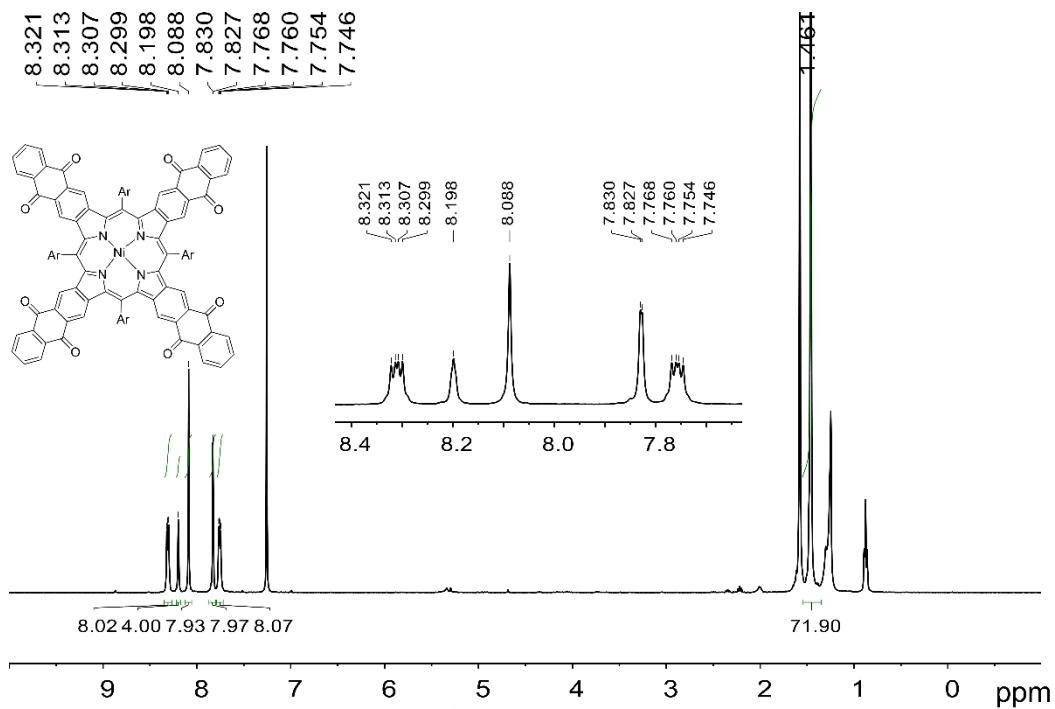

Figure S9.  $^1\text{H}$  NMR spectrum of Ni4AQ in  $\text{CDCl}_3$  (298 K, 400MHz).

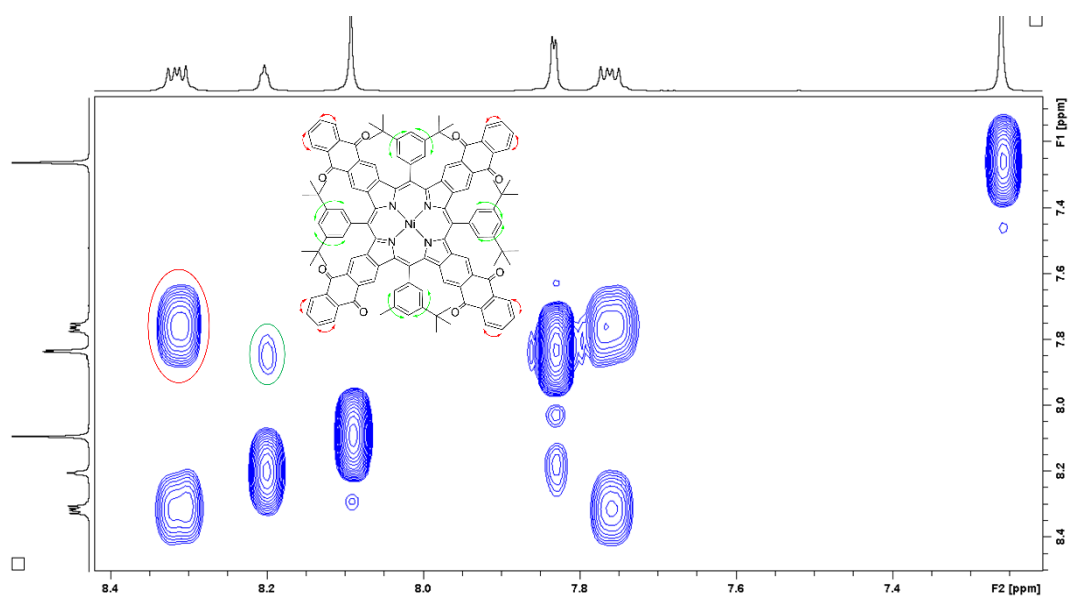

Figure S10.  $^1\text{H}$ ,  $^1\text{H}$ -COSY spectrum of Ni4AQ in  $\text{CDCl}_3$  (298 K, 400MHz).

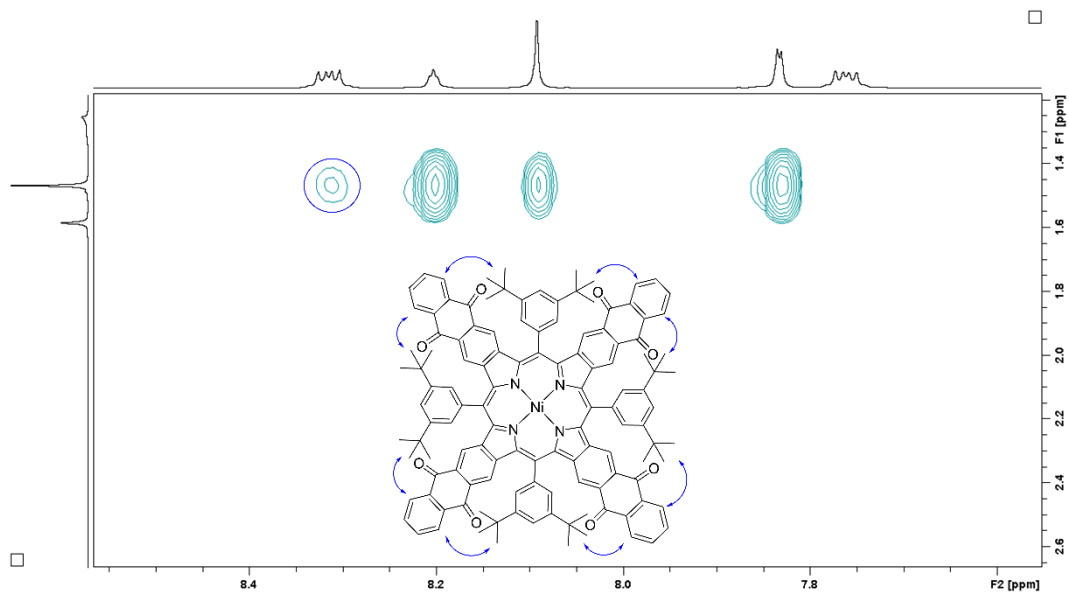

Figure S11.  $^1\text{H}, ^1\text{H}$ -ROESY spectrum of Ni4AQ in  $\text{CDCl}_3$  (298 K, 400MHz).

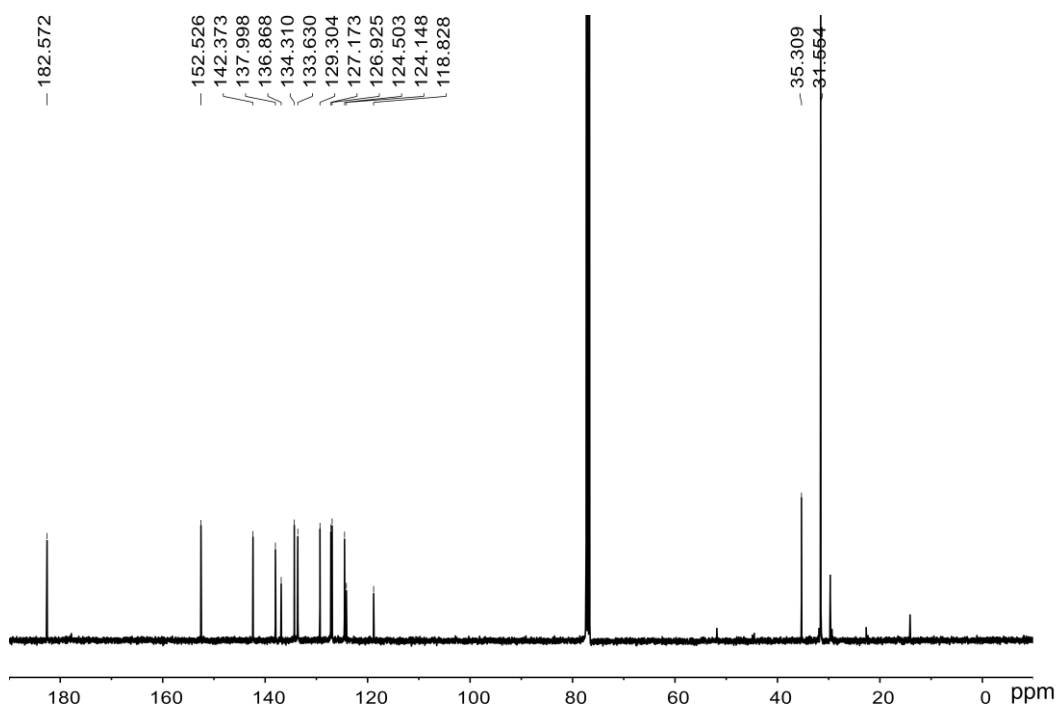

Figure S12.  $^{13}\text{C}$  NMR spectrum of Ni4AQ in  $\text{CDCl}_3$  (298 K, 100MHz).

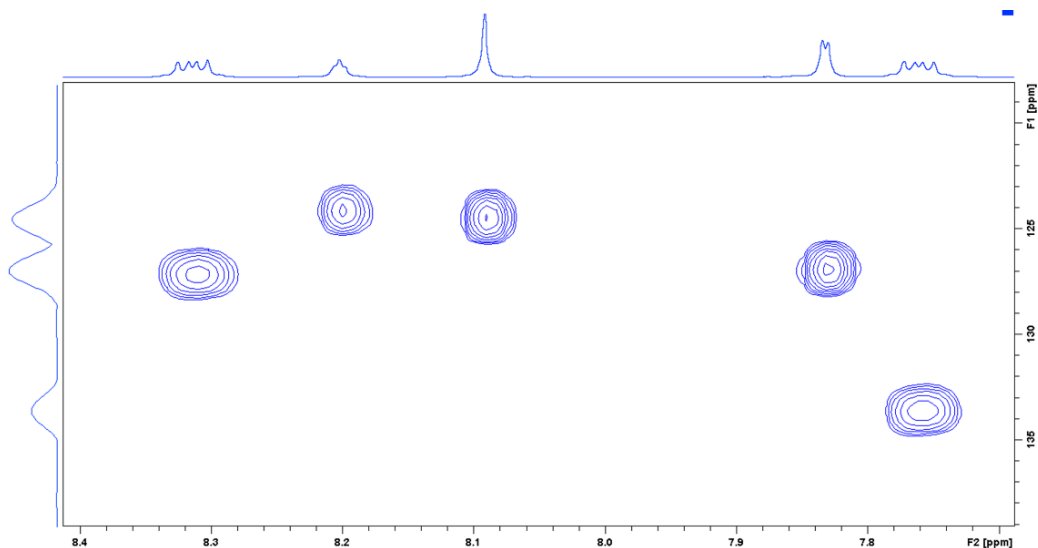

Figure S13.  $^1\text{H}$ ,  $^{13}\text{C}$ -HSQC spectrum of Ni4AQ in  $\text{CDCl}_3$  (298 K, 400MHz).

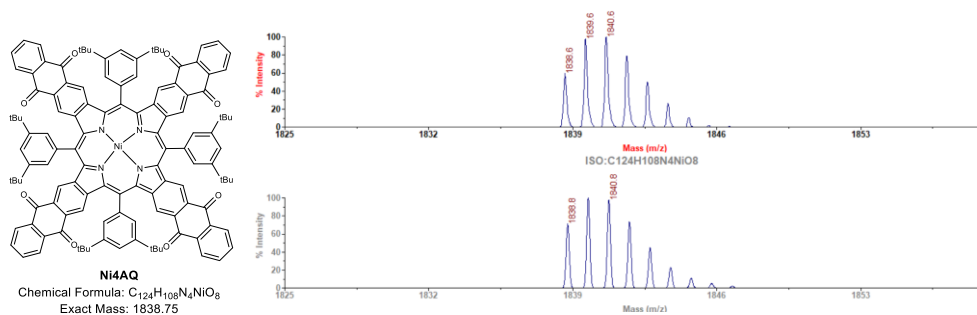

Figure S14. MS (MALDI-TOF) of Ni4AQ.

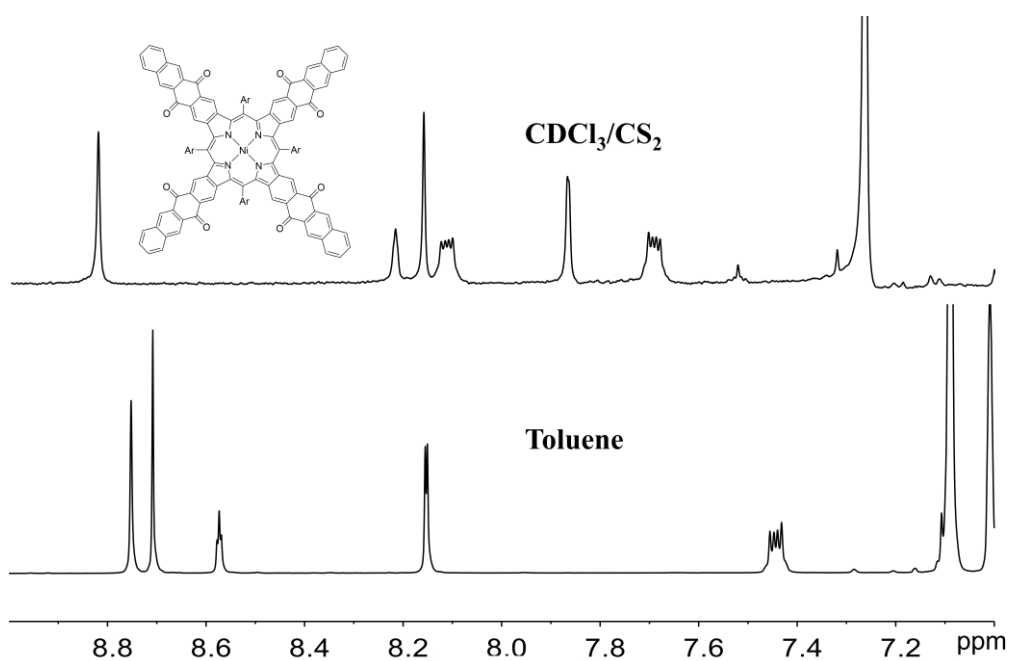

Figure S15.  $^1\text{H}$  NMR spectra of Ni4TQ in  $\text{CDCl}_3/\text{CS}_2$  and  $D^8$ -toluene (298 K, 400MHz).

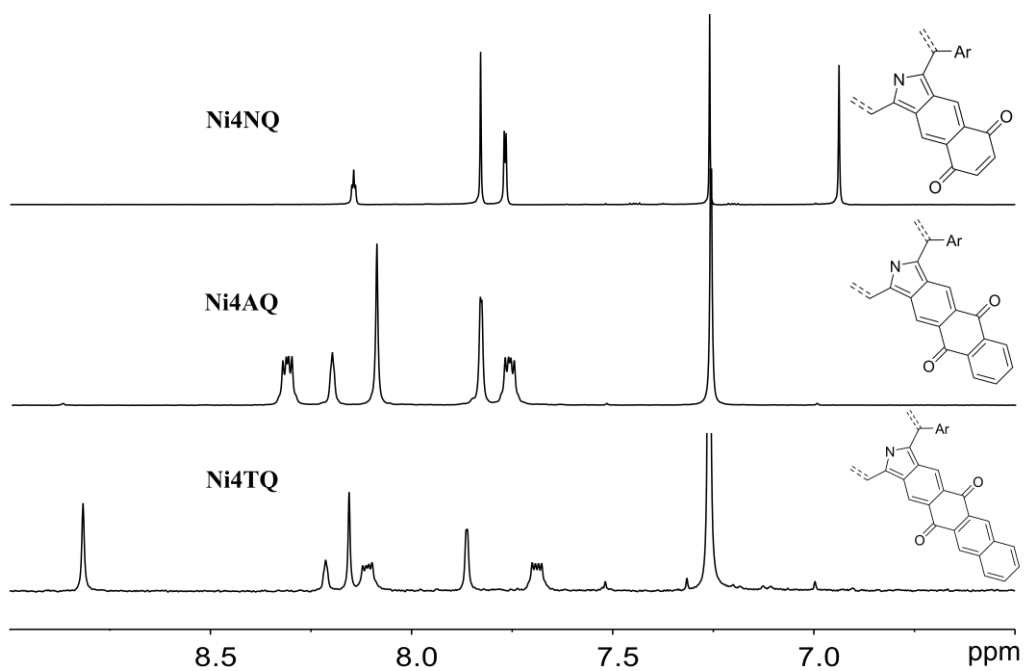

Figure S16. <sup>1</sup>H NMR spectra of Ni4TQ, Ni4AQ and Ni4NQ in CDCl<sub>3</sub> (298 K, 400MHz, partial structures are shown).

### 3. Absorption Spectra and Electrochemical Data

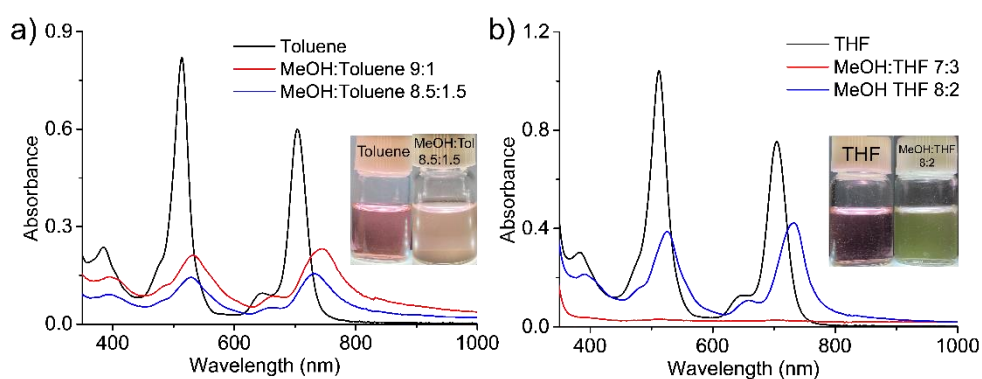

Figure S17. Absorption spectra of Ni4TQ in toluene and in the mixture of toluene/MeOH (a) and in THF and in the mixture of THF/MeOH (b) with pictures of solution color under white light. The green color for suspension solution seems to result from the scattering effect of the nano/microscale structures.

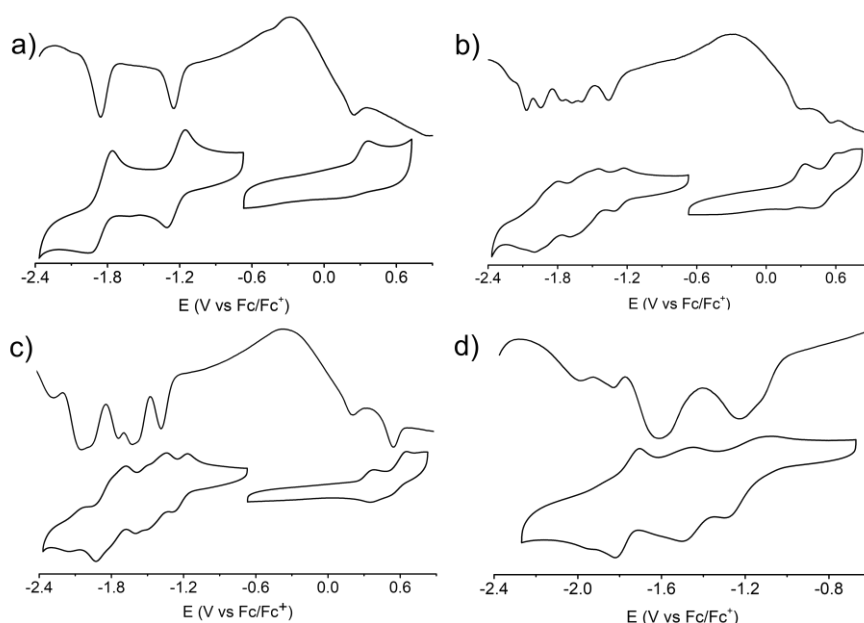

Figure S18. CV and DPV data of Ni4S (a), Ni4TQ (b), Ni4AQ (c) and Ni4NQ (d).

Table S1. DPV data of Ni4S, Ni4TQ, Ni4AQ and Ni4NQ in *o*-dichlorobenzene measured with ferrocene as external standard. HOMO-LUMO energy gap ( $\Delta H-L$ ) =  $e(E_{ox1} - E_{red1})$ .

| Compound | Reduction (V) |            |            |            |            |            |            | Oxidation (V) |           | $\Delta H-L$<br>(eV) |
|----------|---------------|------------|------------|------------|------------|------------|------------|---------------|-----------|----------------------|
|          | $E_{red7}$    | $E_{red6}$ | $E_{red5}$ | $E_{red4}$ | $E_{red3}$ | $E_{red2}$ | $E_{red1}$ | $E_{ox1}$     | $E_{ox2}$ |                      |
| Ni4S     | —             | —          | —          | —          | —          | -1.86      | -1.25      | 0.25          | —         | 1.50                 |
| Ni4TQ    | -2.05         | -1.92      | -1.80      | -1.63      | -1.55      | -1.47      | -1.25      | 0.33          | 0.57      | 1.58                 |
| Ni4AQ    | -2.07         | -1.85      | -1.79      | -1.56      | -1.45      | -1.41      | -1.23      | 0.27          | 0.59      | 1.50                 |
| Ni4NQ    | —             | —          | -1.98      | -1.82      | -1.61      | -1.22      | -1.11      | 0.27          | 0.60      | 1.38                 |

#### 4. SEM images and Crystal structures

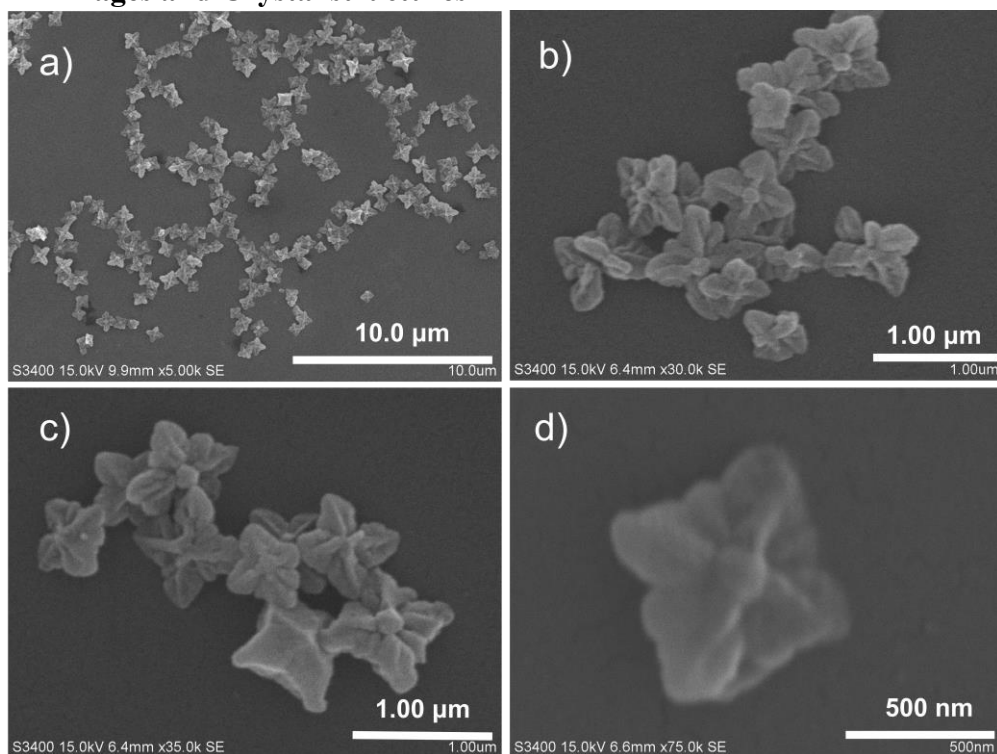

**Figure S19. SEM of Ni<sub>4</sub>TQ assemblies obtained from MeOH:toluene = 9:1 with final concentration of ~5 μM.**

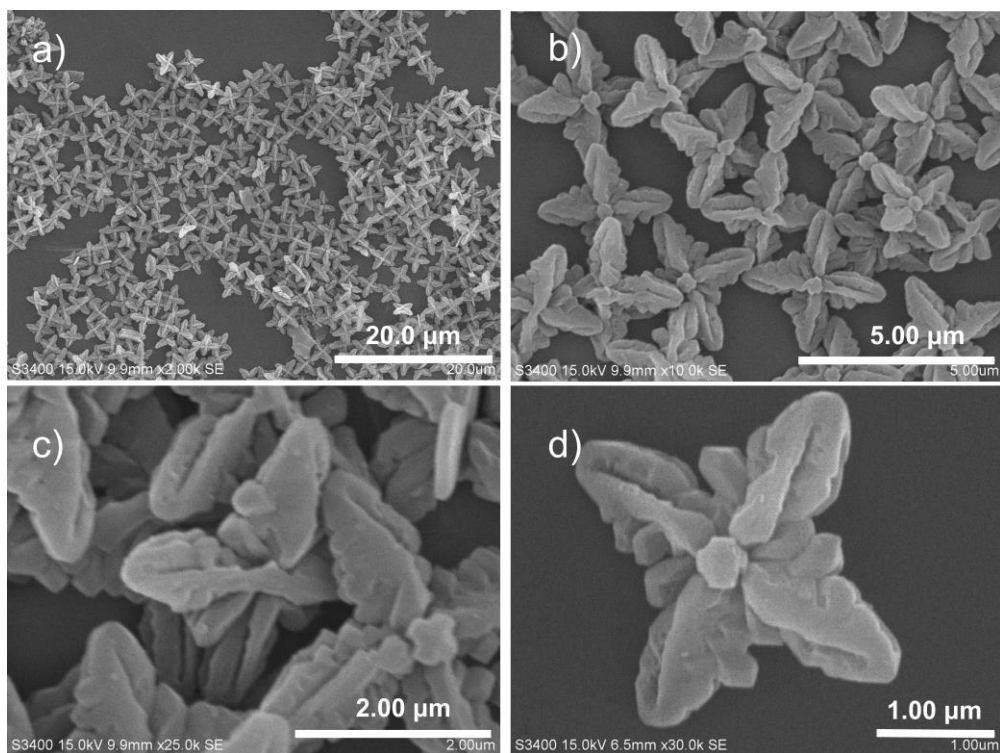

**Figure S20. SEM of Ni<sub>4</sub>TQ assemblies obtained from MeOH:toluene = 8.5:1.5 with final concentration of ~5 μM.**

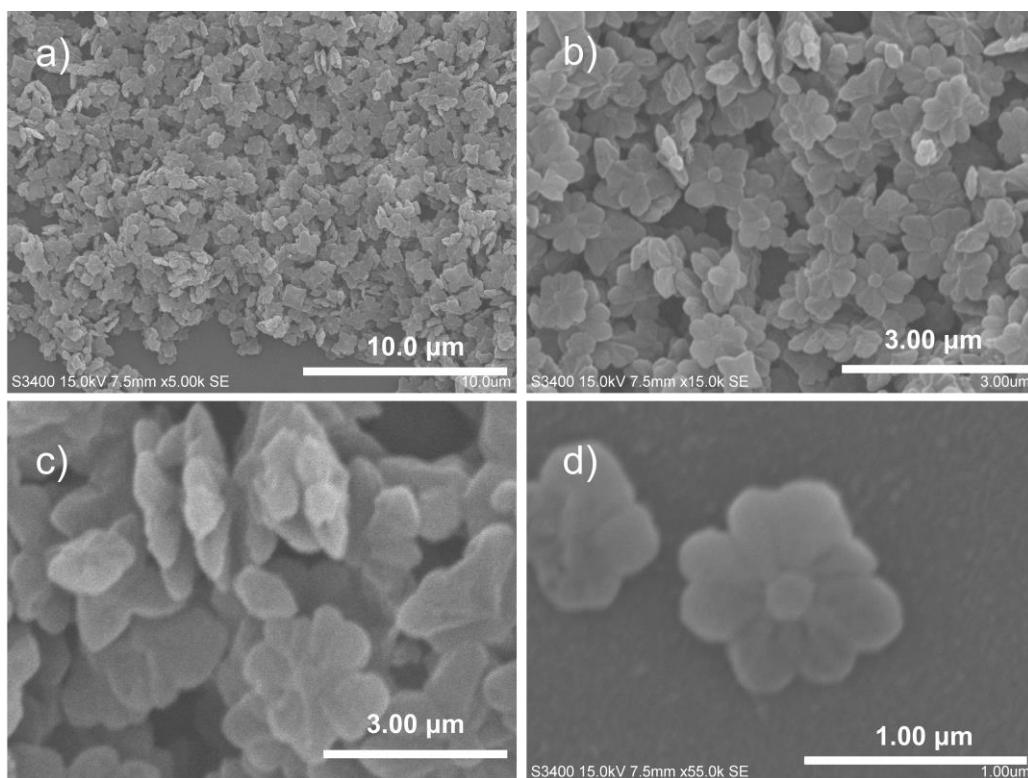

**Figure S21. SEM of Ni<sub>4</sub>TQ assemblies obtained from MeOH:THF = 8:2 with final concentration of ~5 μM.**

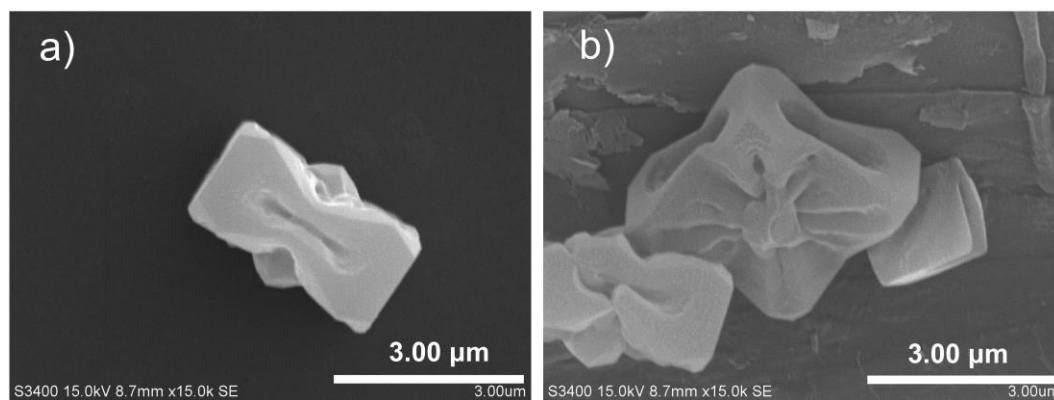

**Figure S22. SEM of Ni<sub>4</sub>TQ assemblies obtained from MeOH:THF = 7:3 after 1 hour with final concentration of ~5 μM.**

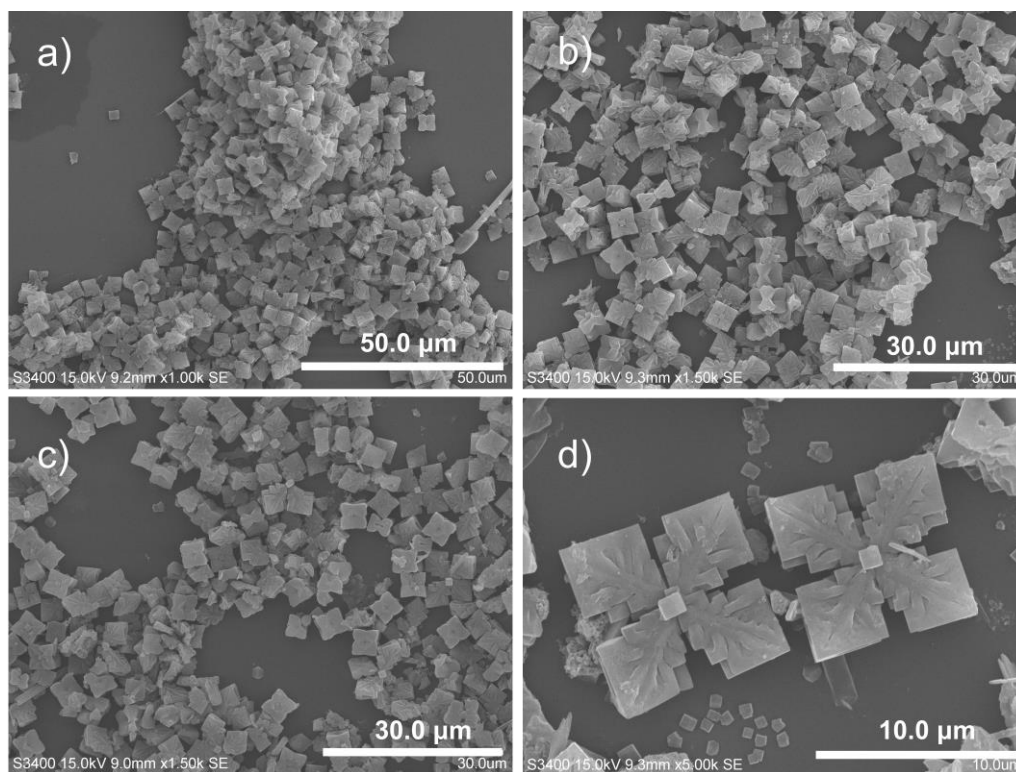

**Figure S23. SEM of Ni<sub>4</sub>TQ assemblies obtained from MeOH:THF = 7:3 with elongation of aggregation time to 18 hours at final concentration of ~5 μM.**

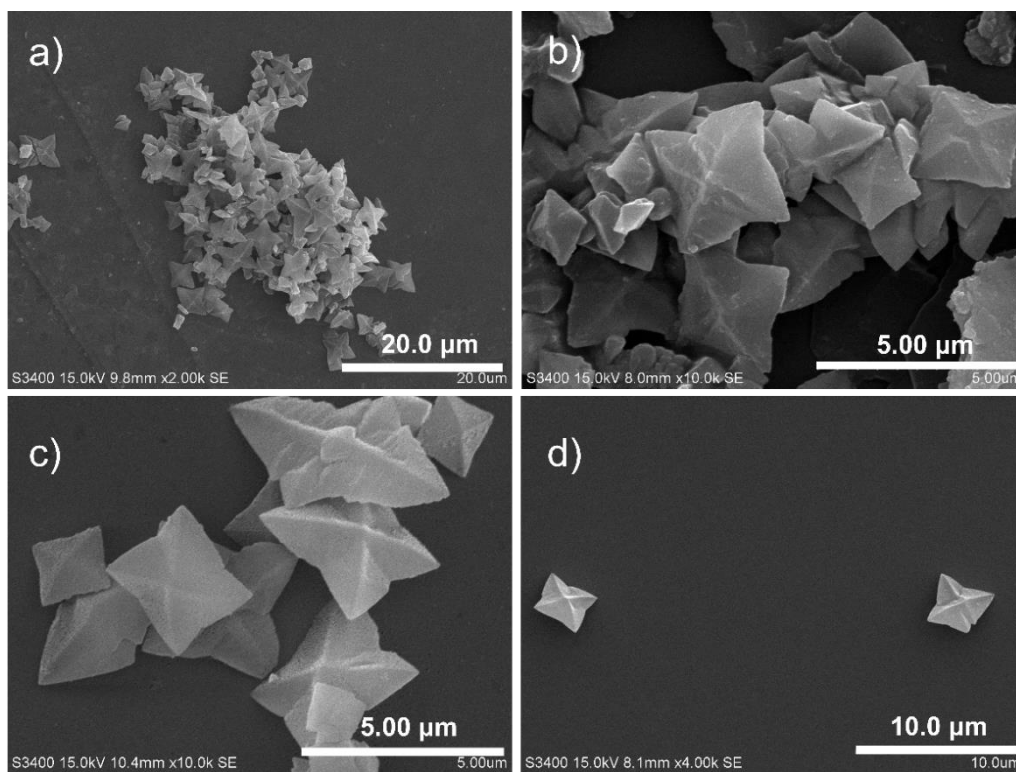

**Figure S24. SEM of Ni<sub>4</sub>TQ assemblies obtained from isopropanol:THF = 100:1 (d) with final concentration of ~5 μM.**



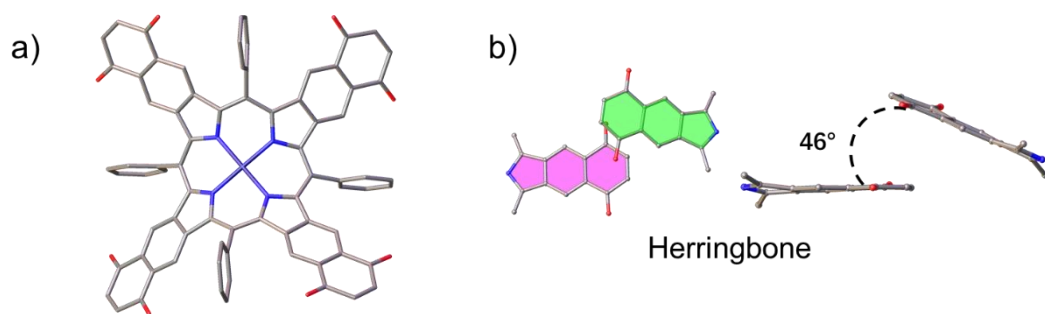

**Figure S25.** (a) Crystal structure of Ni4NQ (tert-butyl groups are omitted for clarity) and (b) partial crystal packing of Ni4NQ. The crystal data is obtained from reference [3].

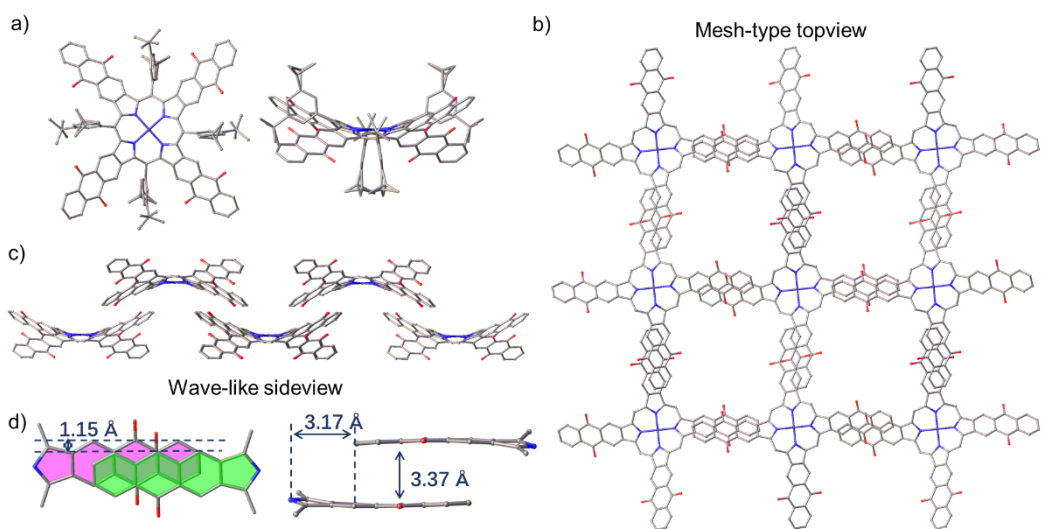

**Figure S26.** (a) Crystal structure (hydrogens are omitted for clarity) and (b-d) crystal packing (hydrogens and the *meso*-substituents are omitted for clarity) of Ni4AQ.

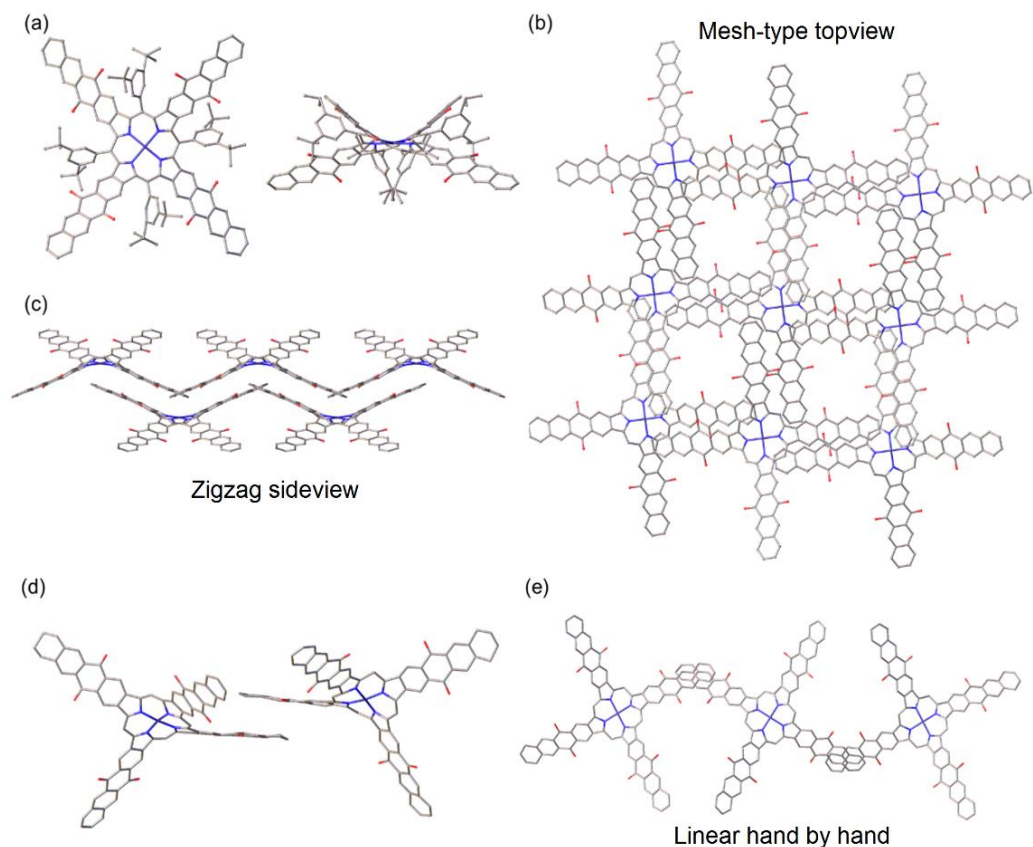

Figure S27. (a) Crystal structure (hydrogens are omitted for clarity), (b-c) crystal packing (hydrogens and the *meso*-substituents are omitted for clarity) obtained from the crystal grown from toluene/*n*-hexane; and (d-e) crystal packing (hydrogens and the *meso*-substituents are omitted for clarity) obtained from rough crystal grown from CS<sub>2</sub>/*n*-hexane of Ni4TQ.

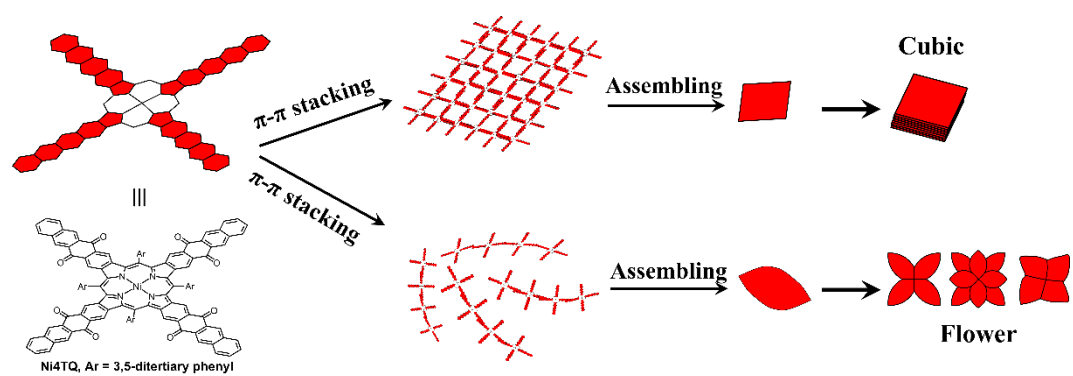

Figure S28. The proposed relationship between the molecular packing and the resulted morphs.

**Table S2. Crystal Data and Structure Refinements of Ni4TQ and Ni4AQ.**

| Compounds                                 | Ni4TQ                                                                   | Ni4AQ                                                             |
|-------------------------------------------|-------------------------------------------------------------------------|-------------------------------------------------------------------|
| Formula                                   | C <sub>140.6</sub> H <sub>117.831</sub> N <sub>4</sub> NiO <sub>8</sub> | C <sub>124</sub> H <sub>108</sub> N <sub>4</sub> NiO <sub>8</sub> |
| Formula weight (g/mol)                    | 2045.79                                                                 | 1840.85                                                           |
| crystal system                            | Tetragonal                                                              | Tetragonal                                                        |
| Temperature (K)                           | 100                                                                     | 295 K                                                             |
| Crystal size (mm)                         | 0.2 × 0.2 × 0.15                                                        | 0.23 × 0.18 × 0.1                                                 |
| Theta range for data collection (°)       | 3.00-67.94                                                              | 4.51-67.89                                                        |
| space group                               | <i>P4</i>                                                               | <i>P42/n</i>                                                      |
| <i>a</i> (Å)                              | 20.4751(3)                                                              | 22.271(2)                                                         |
| <i>b</i> (Å)                              | 20.4751(3)                                                              | 22.271(2)                                                         |
| <i>c</i> (Å)                              | 13.4593(10)                                                             | 12.5290(16)                                                       |
| $\alpha$ (°)                              | 90                                                                      | 90                                                                |
| $\beta$ (°)                               | 90                                                                      | 90                                                                |
| $\gamma$ (°)                              | 90                                                                      | 90                                                                |
| Volume (Å <sup>3</sup> )                  | 5642.5(5)                                                               | 6214.2 (15)                                                       |
| <i>Z</i>                                  | 2                                                                       | 2                                                                 |
| $\rho_{\text{calc}}$ (g/cm <sup>3</sup> ) | 1.204                                                                   | 0.984                                                             |
| <i>F</i> (000)                            | 2158                                                                    | 1944                                                              |
| $\mu$ (mm <sup>-1</sup> )                 | 0.73                                                                    | 0.62                                                              |
| Index ranges                              | -24 ≤ <i>h</i> ≤ 18<br>-24 ≤ <i>k</i> ≤ 15<br>-16 ≤ <i>l</i> ≤ 16       | -23 ≤ <i>h</i> ≤ 26<br>-27 ≤ <i>k</i> ≤ 20<br>-14 ≤ <i>l</i> ≤ 14 |
| <i>R</i> 1 [ <i>I</i> > 2σ( <i>I</i> )]   | 0.071                                                                   | 0.097                                                             |
| <i>wR</i> 2 (all data)                    | 0.221                                                                   | 0.311                                                             |
| GOF                                       | 1.059                                                                   | 1.189                                                             |
| Reflections collected/Unique              | 23848                                                                   | 48412                                                             |
| CCDC number                               | 2082681                                                                 | 2082682                                                           |

## 5. References

- [1] Banala, S.; Rühl, T.; Wurst, K.; Kräutler, B. “Blackening” Porphyrins by Conjugation with Quinones. *Angew. Chem. Int. Ed.* **2009**, *48*, 599-603
- [2] Tilley, A. J.; Pensack, R. D.; Kynaston, E. L.; Scholes, G. D.; Seferos, D. S. Singlet Fission in Core-Shell Micelles of End-Functionalized Polymers. *Chem. Mater.* **2018**, *30*, 4409-4421.
- [3] Banala, S.; Wurst, K.; Kräutler, B. Panchromatic-Extended Porphyrins from Conjugation with Quinones. *ChemPlusChem* **2016**, *81*, 477-488.
